# Supplementary material
Source: PubMed Central journal article supplement (PMC3885245)
Supplement: NIHMS541160-supplement-01.pdf [file NIHMS541160-supplement-01.pdf]

## **Supplemental Information**

### **SMN is essential for the biogenesis of U7 snRNP and 3'-end formation of histone mRNAs**

**Sarah Tisdale, Francesco Lotti, Luciano Saieva, James P. Van Meerbeke, Thomas O. Crawford, Charlotte J. Sumner, George Z. Mentis and Livio Pellizzoni**

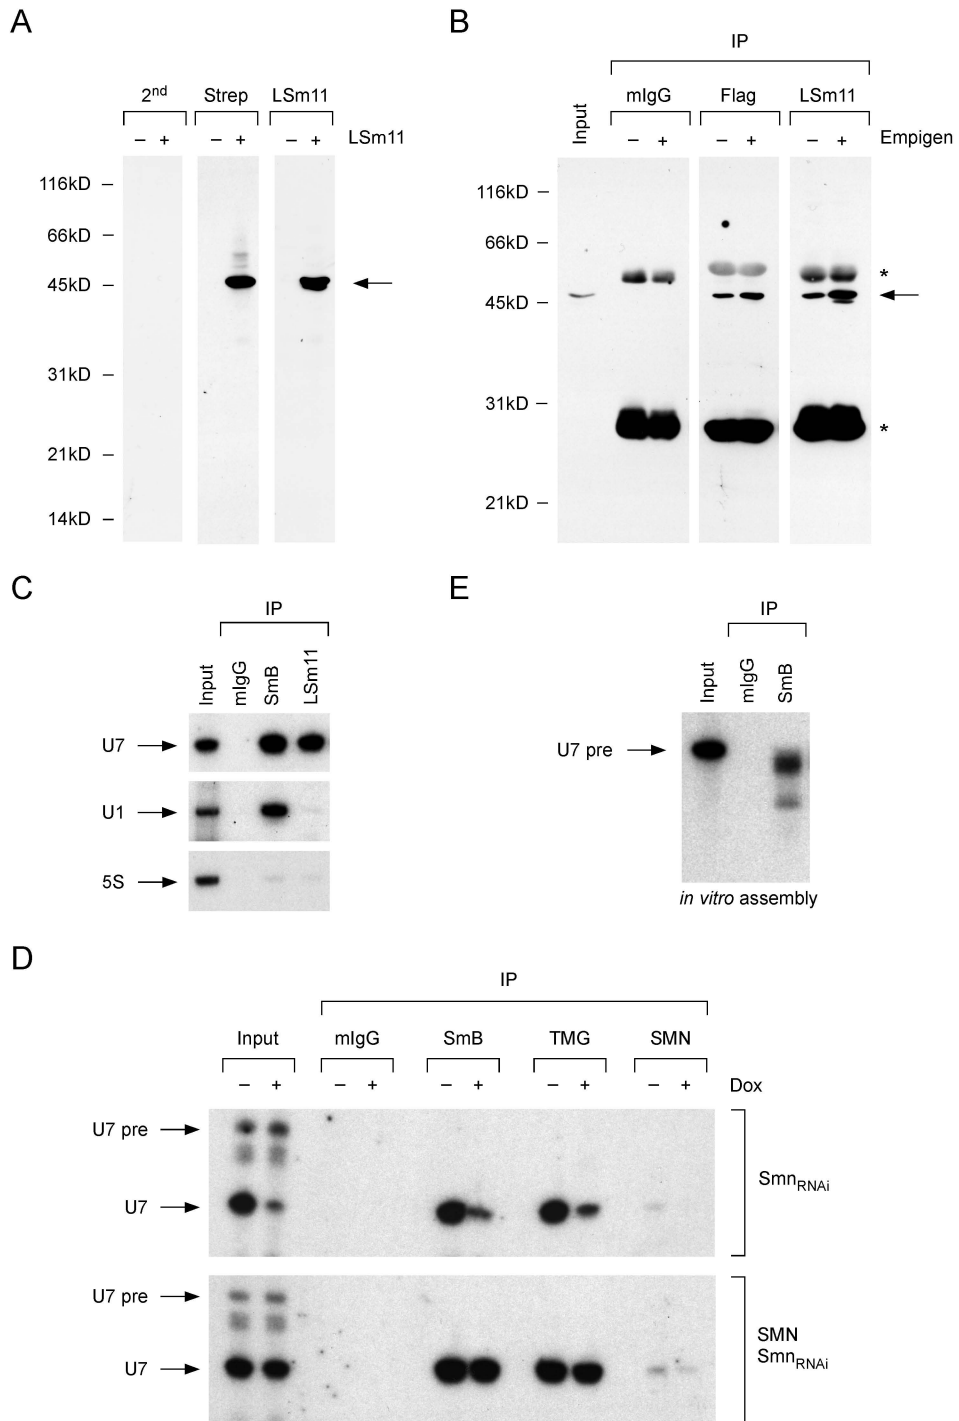

Figure S1

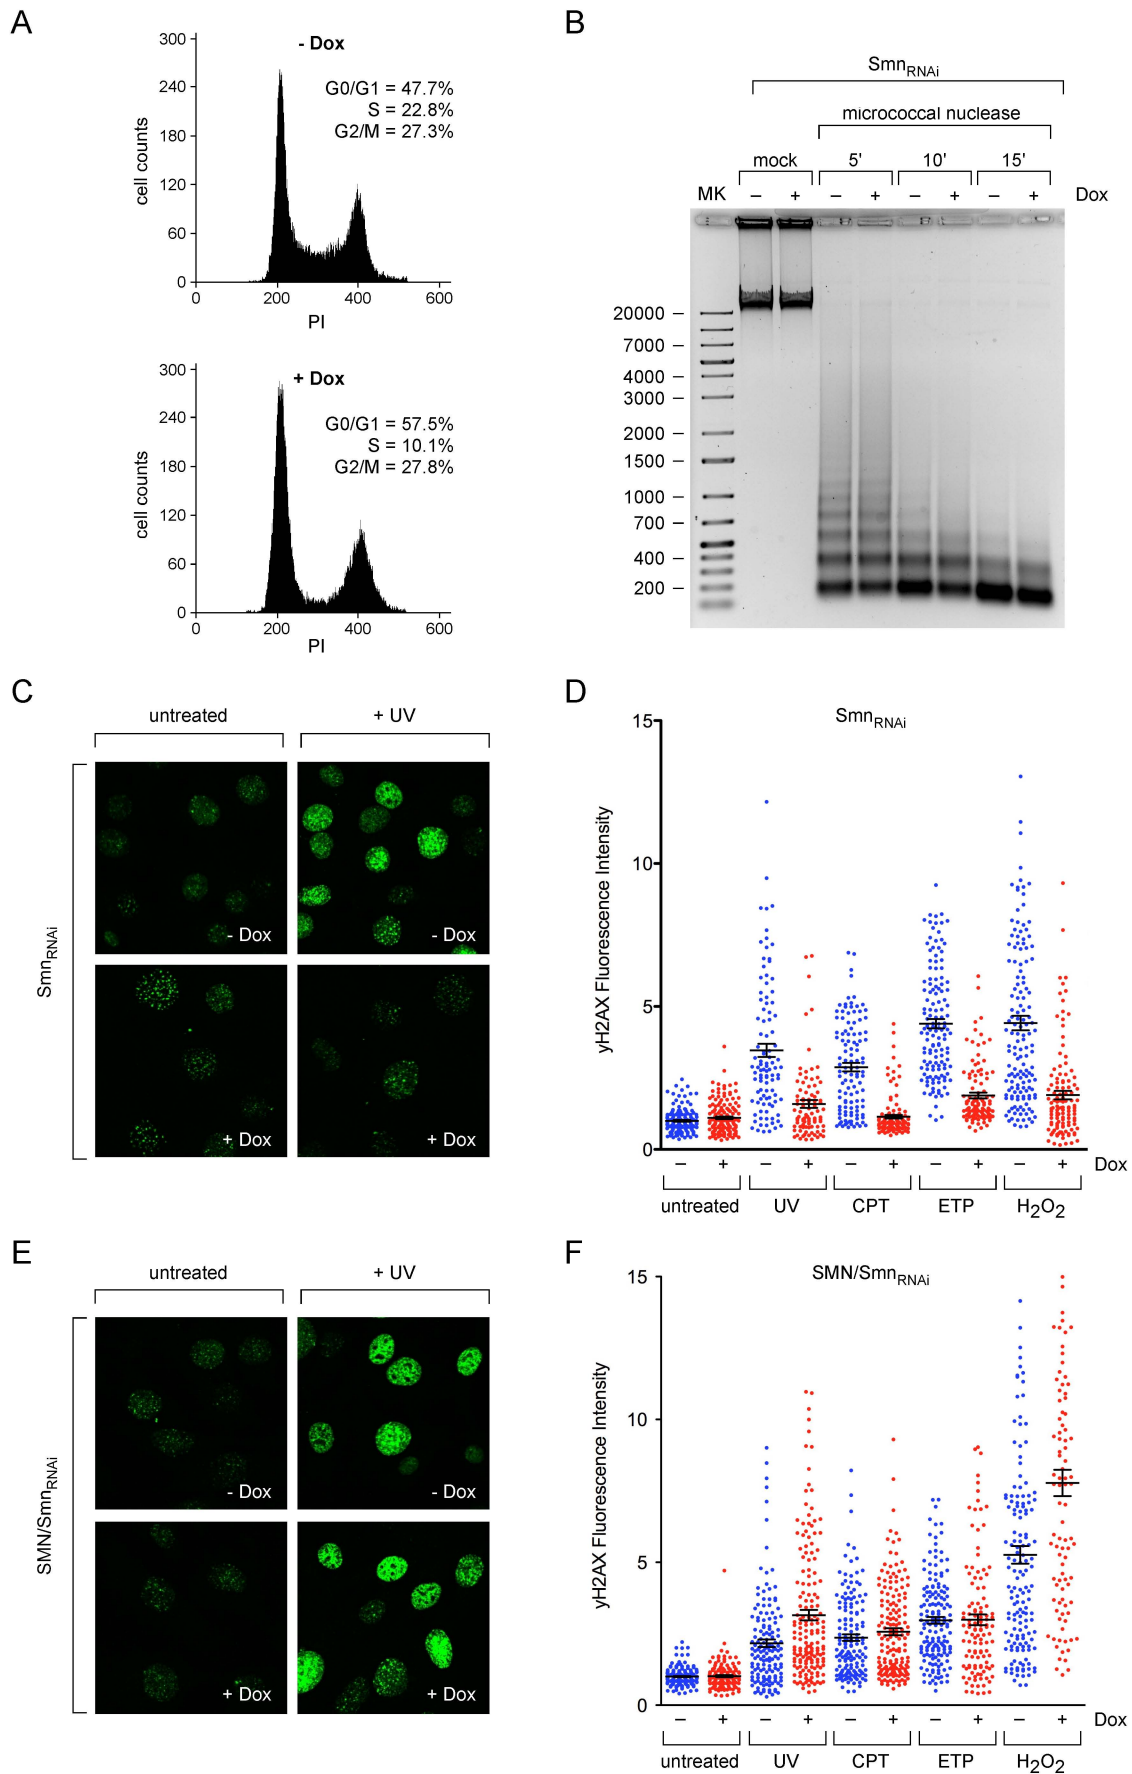

Figure S2

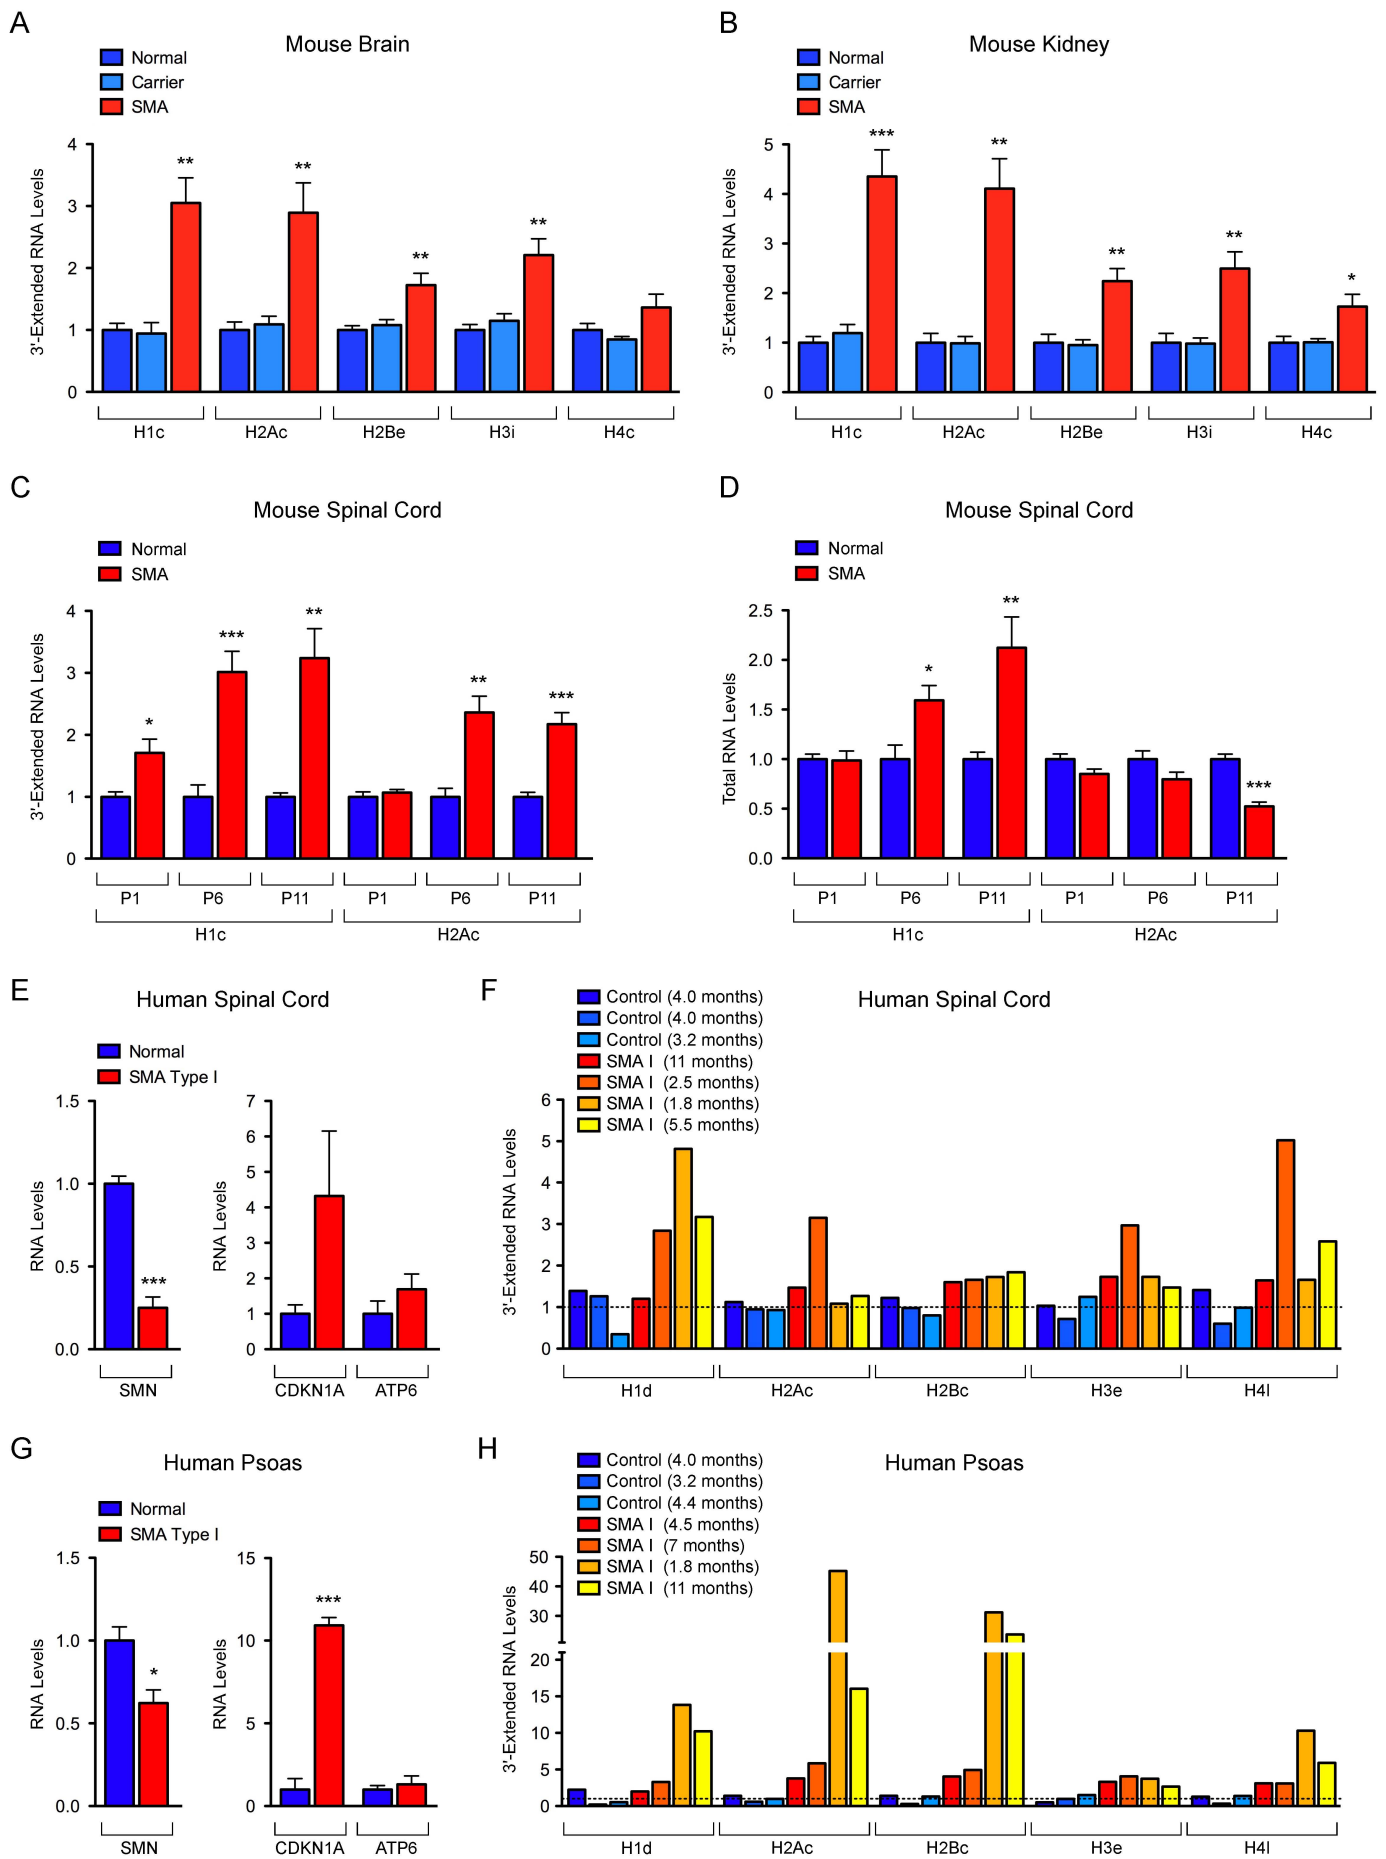

Figure S3

**Figure S1. Characterization of a novel mouse monoclonal antibody against LSm11, Related to Figure 1.** (A) Western blot analysis of HEK293 cells transfected with or without epitope-tagged LSm11 cDNA with the indicated antibodies. (B) Extracts from HEK293 cells transfected with epitope-tagged LSm11 cDNA were immunoprecipitated with antibodies against Flag, LSm11 or control mouse immunoglobulins (mIgG). Immunoprecipitations were carried out in the absence or presence of 1% Empigen, which disrupts most protein-protein as well as RNA-protein interactions. Input and immunoprecipitates were analyzed by Western blot using anti-LSm11 antibodies. (C) Extracts from wild-type NIH3T3 cells were immunoprecipitated with antibodies against SmB, LSm11, or control mouse immunoglobulins (mIgG). Input and immunoprecipitated RNAs were analyzed by Northern blot. (D) Northern blot analysis of U7 snRNAs immunoprecipitated using the indicated antibodies from extracts of NIH3T3-Smn<sub>RNAi</sub> and NIH3T3-SMN/Smn<sub>RNAi</sub> cells cultured with and without Dox for 5 days. (E) *In vitro* snRNP assembly with radioactive U7 snRNA precursor. Reactions were immunoprecipitated with the indicated antibodies followed by denaturing gel electrophoresis and autoradiography.

**Figure S2. SMN deficiency disrupts the cell cycle and alters the levels of phosphorylated H2AX in response to DNA damage in NIH3T3 cells, Related to Figure 3.** (A) Cell cycle analysis of NIH3T3-Smn<sub>RNAi</sub> cells cultured with and without Dox for 5 days. (B) Analysis of nucleosome repeat length by micrococcal nuclease digestion of nuclei isolated from NIH3T3-Smn<sub>RNAi</sub> cells cultured with and without Dox for 5 days. (C) Immunofluorescence analysis of phosphorylated H2AX ( $\gamma$ H2AX) in NIH3T3-Smn<sub>RNAi</sub> cells cultured with and without Dox for 5 days followed by treatment with or without UV. (D) Quantification of the nuclear  $\gamma$ H2AX fluorescence intensity (pixels/ $\mu\text{m}^2$ ) in NIH3T3-

Smn<sub>RNAi</sub> cells cultured with and without Dox for 5 days followed by treatment with UV, camptothecin (CPT), etoposide (ETP) or hydrogen peroxide (H<sub>2</sub>O<sub>2</sub>). Values were normalized to untreated cells. (E) Immunofluorescence analysis of phosphorylated H2AX ( $\gamma$ H2AX) in NIH3T3-SMN/Smn<sub>RNAi</sub> cells treated as in (C). (F) Quantification of the nuclear  $\gamma$ H2AX fluorescence intensity (pixels/ $\mu$ m<sup>2</sup>) in NIH3T3-SMN/Smn<sub>RNAi</sub> treated as in (D). Values were normalized to untreated cells.

**Figure S3. Disruption of histone mRNA 3'-end formation in SMA, Related to Figure**

**4.** (A) RT-qPCR analysis of 3'-extended histone mRNA levels in brain from normal, carrier, and SMA mice at P6. Data are represented as mean and SEM. (B) RT-qPCR analysis of 3'-extended histone mRNA levels in kidney from normal, carrier, and SMA mice at P6. Data are represented as mean and SEM. (C) RT-qPCR analysis of 3'-extended histone mRNA levels in spinal cord from normal and SMA mice at P1, P6 and P11. Data are represented as mean and SEM. (D) RT-qPCR analysis of total histone mRNA levels in spinal cord from normal and SMA mice at P1, P6 and P11. Data are represented as mean and SEM. (E) RT-qPCR analysis of SMN, CDKN1A and ATP6 mRNA levels in the spinal cord from normal individuals (n=3) and SMA patients (n=4). Data were normalized to the average of values in controls and is represented as mean and SEM. (F) RT-qPCR analysis of 3'-extended histone mRNA levels in the spinal cord from normal individuals and SMA patients. Data represent the mean from triplicate reactions normalized to the average of the values in controls. (G) RT-qPCR analysis of SMN, CDKN1A and ATP6 mRNA levels in the psoas from normal individuals (n=3) and SMA patients (n=4). Data were normalized to the average of values in controls and is represented as mean and SEM. (H) RT-qPCR analysis of 3'-extended histone mRNA levels in the psoas from normal individuals and SMA patients. Data represent the mean from triplicate reactions normalized to the average of the values in controls.
